# Supplementary material
Source: MDPI journal article supplement (https://www.mdpi.com/1424-2818/11/6/90)
Supplement: s1 [file s1]

**Table S1.** Primer characteristics [18]

| Marker   | Repeat motif       | Forward primer sequence (5'-3') | Reverse primer sequence (5'-3') | Developed in                |
|----------|--------------------|---------------------------------|---------------------------------|-----------------------------|
| FgSI0006 | (TGT) <sub>n</sub> | TTAACACCGCGGTAGAGACC            | GCTCCAAGCTCTTGCTCACT            | <i>Fagus grandifolia</i>    |
| FgSI0024 | (TCG) <sub>n</sub> | GAATCGTCGGAATCGTTGTC            | CGGTCGAGGATGATGACTTT            | <i>Fagus grandifolia</i> ** |
| FS_C1968 | (TC) <sub>n</sub>  | ATCGTTTCCACTTCCTCCGG            | TTTCATGCACCCTCTCTAGG            | <i>Fagus grandifolia</i>    |
| FS_C2361 | (GAA) <sub>n</sub> | AGGTCCTTCAGTTTGGGAGC            | ATTCCCATGCATCAAAATCC            | <i>Quercus rubra</i>        |
| FgSI0009 | (ACC) <sub>n</sub> | TACCCATGCCCATATCCAGT            | GGAAAGAAGAAGGGTGGAGG            | <i>Fagus grandifolia</i> ** |
| FS_C6785 | (ACC) <sub>n</sub> | TCGCTCTGAATCACCTGTCTG           | GCTTGAGCGACTCGGTTAGG            | <i>Fagus grandifolia</i>    |
| FS_C7377 | (GAT) <sub>n</sub> | AATCGGACGGTCCATAGTGC            | AGATCCGAGCTCAACTCACC            | <i>Fagus grandifolia</i>    |
| FS_C7797 | (TCT) <sub>n</sub> | TGGAATCAAACACCATTGCC            | CTAGCGACTCCGAAGTTCCC            | <i>Fagus grandifolia</i>    |
| FS_C4971 | (GGT) <sub>n</sub> | CATGTGCAATGTAGCTGGGC            | TCAAAGGACCCTGCAATCCC            | <i>Fagus grandifolia</i>    |

\*\*developed by Kubisiak et al. [19]
