# Supplementary material
Source: MDPI journal article supplement (https://www.mdpi.com/1424-2818/11/6/90)
Supplement: s1 [file s1]

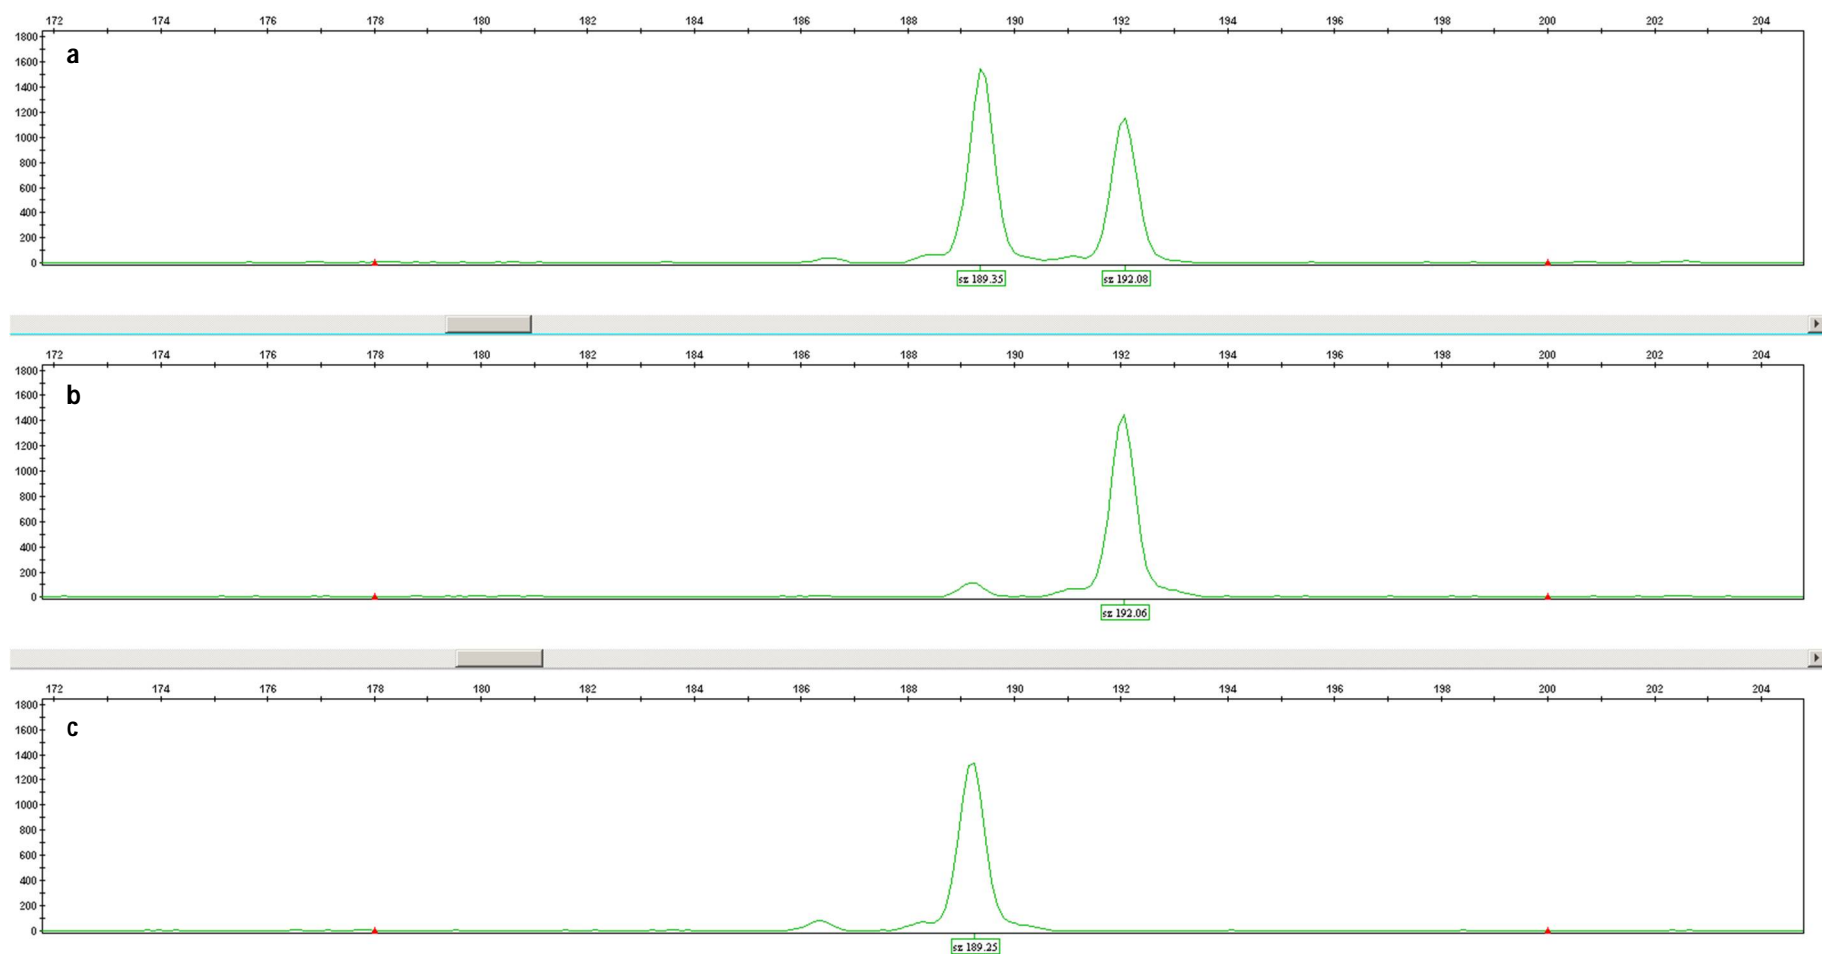

**Figure S1.** Electropherogram showing alleles 189 and 192 of EST-SSR locus Fs\_C6785. Displayed are examples of individuals heterozygous for alleles 189/192 (a), homozygous for allele 192 (b), and homozygous for allele 189 (c).
