# Supplementary material
Source: MDPI journal article supplement (https://www.mdpi.com/1424-2818/11/6/90)

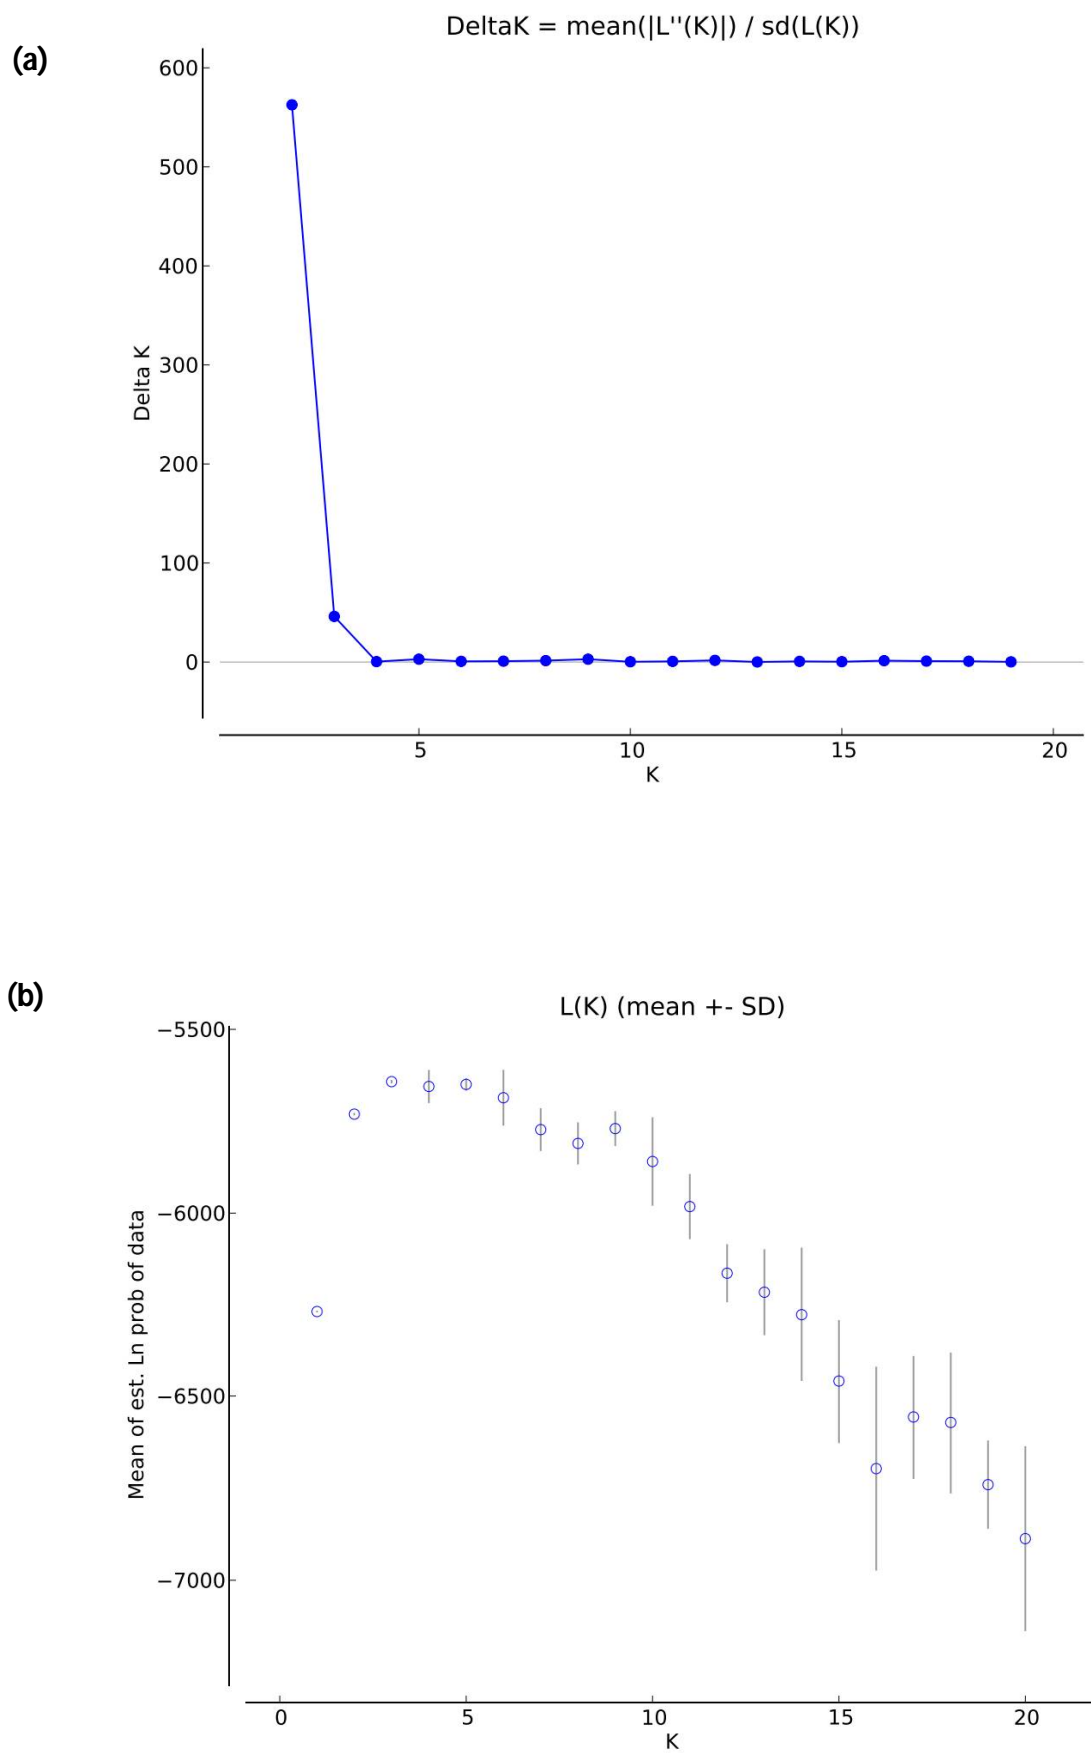

**Figure S2.** Plots of delta K (a) and log likelihood for each K (b)

Supplement: s1 [file s1]
